# Supplementary material
Source: Springer Nature journal article supplement (https://www.springermedizin.de/resource/supplementary/13002_2010_193_MOESM2_ESM.pdf/9627358)

## Legend

### Study sites

- ① Debarok
- ③ Dinsho
- ② Kofele

### Study Zones

- North Gondar
- Arsi
- Bale
- Zone boundary
- lakes

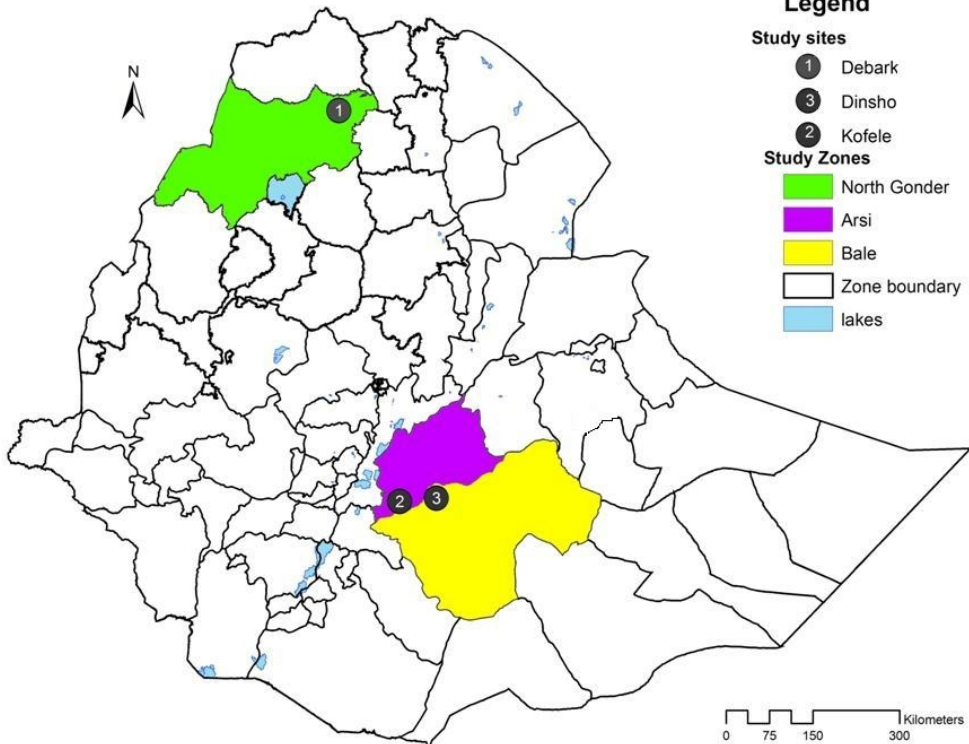

Supplement: MOESM2 [file 9627358]
